# Supplementary material for: Collaborative efforts to forecast seasonal influenza in the United States, 2015–2016
Source: PubMed Central journal article supplement (PMC6346105; doi:10.1038/s41598-018-36361-9), 2019-01-24

## Supplemental Material

### Collaborative efforts to forecast seasonal influenza in the United States, 2015–2016

Craig J McGowan<sup>1</sup>, Matthew Biggerstaff\*<sup>1</sup>, Michael Johansson<sup>2</sup>, Karyn M Apfeldorf<sup>3</sup>, Michal Ben-Nun<sup>4</sup>, Logan Brooks<sup>5</sup>, Matteo Convertino<sup>6, 7</sup>, Madhav Erraguntla<sup>8</sup>, David C Farrow<sup>9</sup>, John Freeze<sup>8</sup>, Saurav Ghosh<sup>10</sup>, Sangwon Hyun<sup>11</sup>, Sasikiran Kandula<sup>12</sup>, Joceline Lega<sup>13</sup>, Yang Liu<sup>7</sup>, Nicholas Michaud<sup>14</sup>, Haruka Morita<sup>12</sup>, Jarad Niemi<sup>15</sup>, Naren Ramakrishnan<sup>10</sup>, Evan L Ray<sup>16</sup>, Nicholas G Reich<sup>17</sup>, Pete Riley<sup>4</sup>, Jeffrey Shaman<sup>12</sup>, Ryan Tibshirani<sup>18</sup>, Alessandro Vespignani<sup>19</sup>, Qian Zhang<sup>19</sup>, Carrie Reed<sup>1</sup>, and the Influenza Forecasting Working Group

<sup>1</sup>Epidemiology and Prevention Branch, Influenza Division; <sup>2</sup>Dengue Branch, Division of Vector-Borne Diseases, Centers for Disease Control and Prevention, Atlanta, Georgia, USA.

<sup>3</sup>Arete Associates, Northridge, California, USA

<sup>4</sup>Predictive Science, Inc., San Diego, California, USA

<sup>5</sup>Computer Science Department, Carnegie Mellon University, Pittsburgh, Pennsylvania, USA

<sup>6</sup>Division of Media and Network Technologies and Division of Frontier Science, Graduate School of Information Science and Technology, Gi-CoRE Station for Big Data & Cybersecurity, Hokkaido University, Sapporo, Japan

<sup>7</sup>Division of Environmental Health Sciences, School of Public Health, University of Minnesota, Minneapolis, Minnesota, USA

<sup>8</sup>Knowledge Based Systems, Inc., College Station, Texas, USA

<sup>9</sup>Computational Biology Department, Carnegie Mellon University, Pittsburgh, Pennsylvania, USA

<sup>10</sup>Discovery Analytics Center, Virginia Tech University, Arlington, Virginia, USA

<sup>11</sup>Department of Statistics and Data Science, Carnegie Mellon University, Pittsburgh, Pennsylvania, USA

<sup>12</sup>Department of Environmental Health Sciences, Mailman School of Public Health, Columbia University, New York, New York, USA

<sup>13</sup>Department of Mathematics, University of Arizona, Tucson, Arizona, USA

<sup>14</sup>Department of Statistics, University of California, Berkeley, Berkeley, California, USA

<sup>15</sup>Department of Statistics, Iowa State University, Ames, Iowa, USA

<sup>16</sup>Department of Mathematics and Statistics, Mount Holyoke College, South Hadley, Massachusetts, USA

<sup>17</sup>Department of Biostatistics and Epidemiology, School of Public Health and Health Sciences, University of Massachusetts, Amherst, Amherst, Massachusetts, USA

<sup>18</sup>Department of Statistics and Data Science, Machine Learning Department, Carnegie Mellon University, Pittsburgh, Pennsylvania, USA

<sup>19</sup>Northeastern University, Boston, Massachusetts, USA.

**Influenza Forecasting Working Group:**

Roni Rosenfeld<sup>20</sup>, Nehemias Ulloa<sup>21</sup>, Katie Will<sup>21</sup>, James Turtle<sup>22</sup>, David Bacon<sup>23</sup>, Steven Riley<sup>22</sup>, and Wan Yang<sup>24</sup>

<sup>20</sup>Computer Science Department, Carnegie Mellon University, Pittsburgh, Pennsylvania, USA

<sup>21</sup>Department of Statistics, Iowa State University, Ames, Iowa, USA

<sup>22</sup>Predictive Science, Inc., San Diego, California, USA

<sup>23</sup>Leidos, Reston, Virginia, USA

<sup>24</sup>Department of Environmental Health Sciences, Mailman School of Public Health, Columbia University, New York, New York, USA

Supplementary Table S1: Average forecast skill for HHS Region 1 targets by forecast team during the 2015-2016 influenza season. **Bold** denotes the highest scoring team for that target.

|                      | Onset week   | Peak week    | Peak intensity | Seasonal average <sup>a</sup> | 1 week ahead | 2 week ahead | 3 week ahead | 4 week ahead | Short-term average <sup>b</sup> |
|----------------------|--------------|--------------|----------------|-------------------------------|--------------|--------------|--------------|--------------|---------------------------------|
| Model A              | 0.595        | 0.010        | 0.382          | 0.102                         | 0.260        | 0.348        | 0.314        | 0.292        | 0.302                           |
| Model B              | 0.266        | 0.066        | 0.616          | 0.215                         | 0.733        | 0.673        | 0.701        | <b>0.668</b> | 0.694                           |
| Model C              | 0.533        | 0.025        | 0.271          | 0.126                         | 0.497        | 0.370        | 0.257        | 0.202        | 0.316                           |
| Model D              | 0.504        | 0.044        | 0.350          | 0.171                         | 0.832        | 0.717        | 0.566        | 0.404        | 0.614                           |
| Model E              | 0.456        | 0.118        | 0.577          | 0.297                         | 0.596        | 0.553        | 0.525        | 0.472        | 0.536                           |
| Model F              | <b>0.639</b> | <b>0.125</b> | 0.700          | <b>0.353</b>                  | 0.689        | 0.648        | 0.633        | 0.557        | 0.631                           |
| Model G              | 0.468        | 0.017        | 0.505          | 0.135                         | 0.731        | 0.661        | 0.638        | 0.594        | 0.656                           |
| Model H              | 0.475        | 0.001        | 0.074          | 0.018                         | 0.037        | 0.103        | 0.033        | 0.013        | 0.036                           |
| Model I <sup>c</sup> | 0.000        | 0.009        | 0.016          | 0.004                         | 0.042        | 0.041        | 0.054        | 0.071        | 0.050                           |
| Model J              | 0.385        | 0.013        | <b>0.739</b>   | 0.136                         | <b>0.882</b> | <b>0.782</b> | 0.664        | 0.608        | <b>0.730</b>                    |
| Model K <sup>c</sup> | 0.024        | 0.052        | 0.080          | 0.052                         | 0.396        | 0.356        | 0.329        | 0.291        | 0.342                           |
| Model L <sup>c</sup> | 0.259        | 0.010        | 0.440          | 0.092                         | 0.416        | 0.717        | <b>0.702</b> | 0.650        | 0.606                           |
| Model M              | 0.000        | 0.002        | 0.004          | 0.001                         | 0.015        | 0.010        | 0.008        | 0.005        | 0.009                           |
| Median Team Skill    | 0.456        | 0.017        | 0.382          | 0.126                         | 0.497        | 0.553        | 0.525        | 0.404        | 0.536                           |
| Hist. Avg. Forecast  | 0.207        | 0.116        | 0.310          | 0.193                         | 0.469        | 0.470        | 0.458        | 0.444        | 0.461                           |
| FluSight Ensemble    | 0.491        | 0.131        | 0.513          | 0.300                         | 0.654        | 0.611        | 0.578        | 0.539        | 0.595                           |

<sup>a</sup> Average of submissions for onset week, peak week, and peak intensity

<sup>b</sup> Average of submissions for 1, 2, 3, and 4 weeks ahead

<sup>c</sup> First forecast received on MMWR week 45 (Model K), 49 (Model L), 50 (Model I), and week 4 (Model N)

Supplementary Table S2: Average forecast skill for HHS Region 2 targets by forecast team during the 2015-2016 influenza season. **Bold** denotes the highest scoring team for that target.

|                      | Onset week   | Peak week    | Peak intensity | Seasonal average <sup>a</sup> | 1 week ahead | 2 week ahead | 3 week ahead | 4 week ahead | Short-term average <sup>b</sup> |
|----------------------|--------------|--------------|----------------|-------------------------------|--------------|--------------|--------------|--------------|---------------------------------|
| Model A              | 0.003        | 0.003        | 0.149          | 0.012                         | 0.132        | 0.172        | 0.137        | 0.101        | 0.134                           |
| Model B              | 0.002        | 0.003        | 0.432          | 0.015                         | <b>0.544</b> | <b>0.530</b> | 0.481        | 0.425        | 0.496                           |
| Model C              | 0.040        | 0.015        | 0.271          | 0.056                         | 0.459        | 0.516        | <b>0.555</b> | <b>0.538</b> | <b>0.513</b>                    |
| Model D              | 0.035        | 0.027        | 0.209          | 0.060                         | 0.223        | 0.231        | 0.223        | 0.184        | 0.215                           |
| Model E              | <b>0.059</b> | <b>0.141</b> | <b>0.523</b>   | <b>0.171</b>                  | 0.403        | 0.433        | 0.396        | 0.392        | 0.406                           |
| Model F              | 0.036        | 0.033        | 0.434          | 0.083                         | 0.419        | 0.479        | 0.399        | 0.361        | 0.414                           |
| Model G              | 0.036        | 0.049        | 0.499          | 0.100                         | 0.529        | 0.512        | 0.440        | 0.424        | 0.477                           |
| Model H              | 0.001        | 0.000        | 0.073          | 0.004                         | 0.379        | 0.226        | 0.076        | 0.040        | 0.135                           |
| Model I <sup>c</sup> | 0.002        | 0.014        | 0.017          | 0.009                         | 0.081        | 0.126        | 0.164        | 0.169        | 0.127                           |
| Model J              | 0.003        | 0.001        | 0.456          | 0.009                         | 0.393        | 0.362        | 0.342        | 0.331        | 0.358                           |
| Model K <sup>c</sup> | 0.002        | 0.011        | 0.015          | 0.007                         | 0.187        | 0.161        | 0.145        | 0.160        | 0.163                           |
| Model L <sup>c</sup> | 0.005        | 0.006        | 0.080          | 0.013                         | 0.038        | 0.045        | 0.032        | 0.029        | 0.036                           |
| Model M              | 0.000        | 0.001        | 0.001          | 0.000                         | 0.023        | 0.016        | 0.003        | 0.002        | 0.008                           |
| Median Team Skill    | 0.003        | 0.011        | 0.209          | 0.013                         | 0.379        | 0.231        | 0.223        | 0.184        | 0.215                           |
| Hist. Avg. Forecast  | 0.152        | 0.016        | 0.282          | 0.086                         | 0.341        | 0.334        | 0.323        | 0.317        | 0.329                           |
| FluSight Ensemble    | 0.072        | 0.096        | 0.398          | 0.144                         | 0.452        | 0.445        | 0.398        | 0.374        | 0.418                           |

<sup>a</sup> Average of submissions for onset week, peak week, and peak intensity

<sup>b</sup> Average of submissions for 1, 2, 3, and 4 weeks ahead

<sup>c</sup> First forecast received on MMWR week 45 (Model K), 49 (Model L), 50 (Model I), and week 4 (Model N)

Supplementary Table S3: Average forecast skill for HHS Region 3 targets by forecast team during the 2015-2016 influenza season. **Bold** denotes the highest scoring team for that target.

|                      | Onset week   | Peak week    | Peak intensity | Seasonal average <sup>a</sup> | 1 week ahead | 2 week ahead | 3 week ahead | 4 week ahead | Short-term average <sup>b</sup> |
|----------------------|--------------|--------------|----------------|-------------------------------|--------------|--------------|--------------|--------------|---------------------------------|
| Model A              | 0.330        | 0.003        | 0.632          | 0.062                         | 0.162        | 0.159        | 0.135        | 0.086        | 0.131                           |
| Model B              | 0.566        | 0.003        | 0.431          | 0.057                         | 0.576        | 0.427        | 0.355        | 0.302        | 0.403                           |
| Model C              | 0.384        | 0.029        | 0.152          | 0.090                         | 0.448        | 0.253        | 0.184        | 0.140        | 0.233                           |
| Model D              | 0.436        | 0.025        | 0.147          | 0.085                         | 0.676        | 0.425        | 0.312        | 0.224        | 0.377                           |
| Model E              | 0.320        | <b>0.348</b> | <b>0.659</b>   | <b>0.447</b>                  | 0.645        | 0.559        | 0.461        | 0.402        | 0.509                           |
| Model F              | <b>0.694</b> | 0.229        | 0.489          | 0.380                         | <b>0.772</b> | <b>0.672</b> | 0.551        | 0.503        | <b>0.616</b>                    |
| Model G              | 0.446        | 0.236        | 0.394          | 0.326                         | 0.716        | 0.601        | 0.526        | 0.482        | 0.575                           |
| Model H              | 0.064        | 0.003        | 0.051          | 0.016                         | 0.570        | 0.269        | 0.145        | 0.099        | 0.217                           |
| Model I <sup>c</sup> | 0.001        | 0.002        | 0.007          | 0.003                         | 0.012        | 0.010        | 0.009        | 0.008        | 0.010                           |
| Model J              | 0.643        | 0.003        | 0.235          | 0.046                         | 0.656        | 0.595        | <b>0.580</b> | <b>0.563</b> | 0.598                           |
| Model K <sup>c</sup> | 0.004        | 0.048        | 0.093          | 0.041                         | 0.168        | 0.161        | 0.163        | 0.163        | 0.164                           |
| Model L <sup>c</sup> | 0.509        | 0.006        | 0.174          | 0.050                         | 0.440        | 0.193        | 0.125        | 0.107        | 0.184                           |
| Model M              | 0.000        | 0.005        | 0.006          | 0.002                         | 0.007        | 0.005        | 0.003        | 0.003        | 0.005                           |
| Median Team Skill    | 0.384        | 0.006        | 0.174          | 0.057                         | 0.570        | 0.269        | 0.184        | 0.163        | 0.233                           |
| Hist. Avg. Forecast  | 0.116        | 0.119        | 0.184          | 0.142                         | 0.422        | 0.425        | 0.425        | 0.421        | 0.423                           |
| FluSight Ensemble    | 0.444        | 0.161        | 0.419          | 0.285                         | 0.623        | 0.531        | 0.472        | 0.432        | 0.509                           |

<sup>a</sup> Average of submissions for onset week, peak week, and peak intensity

<sup>b</sup> Average of submissions for 1, 2, 3, and 4 weeks ahead

<sup>c</sup> First forecast received on MMWR week 45 (Model K), 49 (Model L), 50 (Model I), and week 4 (Model N)

Supplementary Table S4: Average forecast skill for HHS Region 4 targets by forecast team during the 2015-2016 influenza season. **Bold** denotes the highest scoring team for that target.

|                      | Onset week   | Peak week    | Peak intensity | Seasonal average <sup>a</sup> | 1 week ahead | 2 week ahead | 3 week ahead | 4 week ahead | Short-term average <sup>b</sup> |
|----------------------|--------------|--------------|----------------|-------------------------------|--------------|--------------|--------------|--------------|---------------------------------|
| Model A              | 0.003        | 0.003        | 0.229          | 0.015                         | 0.014        | 0.022        | 0.026        | 0.030        | 0.022                           |
| Model B              | 0.002        | 0.005        | 0.436          | 0.019                         | 0.474        | 0.400        | 0.352        | 0.339        | 0.388                           |
| Model C              | 0.032        | 0.033        | 0.241          | 0.069                         | 0.511        | 0.302        | 0.191        | 0.123        | 0.245                           |
| Model D              | 0.019        | 0.045        | 0.219          | 0.065                         | 0.698        | 0.545        | 0.367        | 0.233        | 0.425                           |
| Model E              | 0.013        | 0.114        | <b>0.648</b>   | 0.124                         | 0.615        | 0.627        | <b>0.637</b> | <b>0.590</b> | <b>0.617</b>                    |
| Model F              | 0.004        | <b>0.151</b> | 0.578          | 0.100                         | 0.740        | 0.627        | 0.474        | 0.360        | 0.530                           |
| Model G              | 0.026        | 0.143        | 0.505          | <b>0.148</b>                  | <b>0.777</b> | <b>0.658</b> | 0.554        | 0.475        | 0.606                           |
| Model H              | 0.000        | 0.002        | 0.039          | 0.003                         | 0.048        | 0.142        | 0.037        | 0.018        | 0.046                           |
| Model I <sup>c</sup> | 0.004        | 0.004        | 0.005          | 0.004                         | 0.089        | 0.074        | 0.052        | 0.038        | 0.060                           |
| Model J              | 0.000        | 0.027        | 0.148          | 0.016                         | 0.277        | 0.135        | 0.075        | 0.071        | 0.119                           |
| Model K <sup>c</sup> | 0.001        | 0.053        | 0.047          | 0.020                         | 0.386        | 0.392        | 0.363        | 0.329        | 0.367                           |
| Model L <sup>c</sup> | 0.004        | 0.018        | 0.405          | 0.038                         | 0.171        | 0.094        | 0.128        | 0.204        | 0.143                           |
| Model M              | 0.000        | 0.004        | 0.006          | 0.002                         | 0.058        | 0.022        | 0.021        | 0.010        | 0.023                           |
| Median Team Skill    | 0.004        | 0.027        | 0.229          | 0.020                         | 0.386        | 0.302        | 0.191        | 0.204        | 0.245                           |
| Hist. Avg. Forecast  | <b>0.194</b> | 0.002        | 0.309          | 0.045                         | 0.251        | 0.258        | 0.267        | 0.272        | 0.262                           |
| FluSight Ensemble    | 0.052        | 0.132        | 0.405          | 0.158                         | 0.560        | 0.489        | 0.437        | 0.399        | 0.468                           |

<sup>a</sup> Average of submissions for onset week, peak week, and peak intensity

<sup>b</sup> Average of submissions for 1, 2, 3, and 4 weeks ahead

<sup>c</sup> First forecast received on MMWR week 45 (Model K), 49 (Model L), 50 (Model I), and week 4 (Model N)

Supplementary Table S5: Average forecast skill for HHS Region 5 targets by forecast team during the 2015-2016 influenza season. **Bold** denotes the highest scoring team for that target.

|                      | Onset week   | Peak week    | Peak intensity | Seasonal average <sup>a</sup> | 1 week ahead | 2 week ahead | 3 week ahead | 4 week ahead | Short-term average <sup>b</sup> |
|----------------------|--------------|--------------|----------------|-------------------------------|--------------|--------------|--------------|--------------|---------------------------------|
| Model A              | 0.003        | 0.004        | 0.150          | 0.013                         | 0.129        | 0.097        | 0.130        | 0.175        | 0.129                           |
| Model B              | 0.087        | <b>0.218</b> | 0.562          | <b>0.220</b>                  | 0.771        | 0.702        | 0.665        | 0.614        | 0.691                           |
| Model C              | 0.066        | 0.019        | 0.184          | 0.061                         | 0.537        | 0.219        | 0.113        | 0.049        | 0.173                           |
| Model D              | 0.043        | 0.028        | 0.180          | 0.060                         | 0.817        | 0.539        | 0.356        | 0.200        | 0.441                           |
| Model E              | 0.089        | 0.155        | <b>0.607</b>   | 0.204                         | 0.724        | 0.691        | 0.659        | <b>0.678</b> | 0.689                           |
| Model F              | 0.046        | 0.061        | 0.576          | 0.117                         | <b>0.914</b> | <b>0.800</b> | <b>0.694</b> | 0.666        | <b>0.771</b>                    |
| Model G              | <b>0.144</b> | 0.011        | 0.520          | 0.094                         | 0.899        | 0.750        | 0.649        | 0.606        | 0.727                           |
| Model H              | 0.002        | 0.001        | 0.066          | 0.006                         | 0.080        | 0.038        | 0.057        | 0.026        | 0.047                           |
| Model I <sup>c</sup> | 0.002        | 0.008        | 0.013          | 0.006                         | 0.126        | 0.183        | 0.286        | 0.194        | 0.186                           |
| Model J              | 0.000        | 0.184        | 0.214          | 0.025                         | 0.289        | 0.210        | 0.248        | 0.324        | 0.263                           |
| Model K <sup>c</sup> | 0.039        | 0.037        | 0.073          | 0.047                         | 0.287        | 0.256        | 0.230        | 0.197        | 0.243                           |
| Model L <sup>c</sup> | 0.010        | 0.003        | 0.294          | 0.020                         | 0.879        | 0.275        | 0.343        | 0.283        | 0.404                           |
| Model M              | 0.001        | 0.002        | 0.002          | 0.001                         | 0.388        | 0.188        | 0.064        | 0.017        | 0.105                           |
| Median Team Skill    | 0.039        | 0.019        | 0.184          | 0.047                         | 0.537        | 0.256        | 0.286        | 0.200        | 0.263                           |
| Hist. Avg. Forecast  | 0.127        | 0.140        | 0.388          | 0.191                         | 0.425        | 0.439        | 0.446        | 0.453        | 0.440                           |
| FluSight Ensemble    | 0.092        | 0.163        | 0.423          | 0.185                         | 0.670        | 0.564        | 0.513        | 0.466        | 0.555                           |

<sup>a</sup> Average of submissions for onset week, peak week, and peak intensity

<sup>b</sup> Average of submissions for 1, 2, 3, and 4 weeks ahead

<sup>c</sup> First forecast received on MMWR week 45 (Model K), 49 (Model L), 50 (Model I), and week 4 (Model N)

Supplementary Table S6: Average forecast skill for HHS Region 6 targets by forecast team during the 2015-2016 influenza season. **Bold** denotes the highest scoring team for that target.

|                      | Onset week   | Peak week    | Peak intensity | Seasonal average <sup>a</sup> | 1 week ahead | 2 week ahead | 3 week ahead | 4 week ahead | Short-term average <sup>b</sup> |
|----------------------|--------------|--------------|----------------|-------------------------------|--------------|--------------|--------------|--------------|---------------------------------|
| Model A              | <b>0.713</b> | 0.004        | 0.041          | 0.028                         | 0.086        | 0.089        | 0.080        | 0.068        | 0.080                           |
| Model B              | 0.259        | 0.086        | 0.339          | 0.187                         | 0.326        | 0.288        | 0.240        | 0.193        | 0.259                           |
| Model C              | 0.451        | 0.013        | 0.384          | 0.104                         | 0.256        | 0.161        | 0.122        | 0.102        | 0.153                           |
| Model D              | 0.472        | 0.016        | <b>0.505</b>   | 0.127                         | 0.551        | 0.338        | 0.188        | 0.188        | 0.290                           |
| Model E              | 0.540        | 0.187        | 0.047          | 0.135                         | 0.358        | 0.201        | 0.125        | 0.068        | 0.162                           |
| Model F              | 0.516        | 0.206        | 0.243          | 0.266                         | <b>0.588</b> | <b>0.500</b> | <b>0.419</b> | <b>0.337</b> | <b>0.456</b>                    |
| Model G              | 0.188        | <b>0.361</b> | 0.299          | <b>0.293</b>                  | 0.505        | 0.404        | 0.334        | 0.302        | 0.382                           |
| Model H              | 0.006        | 0.019        | 0.008          | 0.010                         | 0.001        | 0.008        | 0.002        | 0.001        | 0.002                           |
| Model I <sup>c</sup> | 0.000        | 0.006        | 0.025          | 0.004                         | 0.026        | 0.032        | 0.025        | 0.021        | 0.026                           |
| Model J              | 0.090        | 0.017        | 0.060          | 0.040                         | 0.395        | 0.266        | 0.202        | 0.132        | 0.235                           |
| Model K <sup>c</sup> | 0.012        | 0.059        | 0.046          | 0.038                         | 0.104        | 0.097        | 0.089        | 0.077        | 0.092                           |
| Model L <sup>c</sup> | 0.537        | 0.012        | 0.175          | 0.078                         | 0.157        | 0.067        | 0.050        | 0.042        | 0.070                           |
| Model M              | 0.000        | 0.001        | 0.002          | 0.001                         | 0.002        | 0.002        | 0.001        | 0.001        | 0.001                           |
| Median Team Skill    | 0.259        | 0.017        | 0.060          | 0.078                         | 0.256        | 0.161        | 0.122        | 0.077        | 0.153                           |
| Hist. Avg. Forecast  | 0.222        | 0.226        | 0.137          | 0.184                         | 0.223        | 0.225        | 0.227        | 0.223        | 0.224                           |
| FluSight Ensemble    | 0.438        | 0.169        | 0.292          | 0.256                         | 0.432        | 0.360        | 0.304        | 0.265        | 0.338                           |

<sup>a</sup> Average of submissions for onset week, peak week, and peak intensity

<sup>b</sup> Average of submissions for 1, 2, 3, and 4 weeks ahead

<sup>c</sup> First forecast received on MMWR week 45 (Model K), 49 (Model L), 50 (Model I), and week 4 (Model N)



Supplementary Table S7: Average forecast skill for HHS Region 7 targets by forecast team during the 2015-2016 influenza season. **Bold** denotes the highest scoring team for that target.

|                      | Onset week   | Peak week    | Peak intensity | Seasonal average <sup>a</sup> | 1 week ahead | 2 week ahead | 3 week ahead | 4 week ahead | Short-term average <sup>b</sup> |
|----------------------|--------------|--------------|----------------|-------------------------------|--------------|--------------|--------------|--------------|---------------------------------|
| Model A              | 0.003        | 0.003        | 0.037          | 0.007                         | 0.078        | 0.095        | 0.191        | 0.225        | 0.128                           |
| Model B              | 0.059        | 0.190        | 0.261          | 0.143                         | 0.799        | 0.778        | 0.682        | <b>0.620</b> | 0.722                           |
| Model C              | 0.053        | 0.024        | 0.153          | 0.058                         | 0.653        | 0.332        | 0.158        | 0.099        | 0.257                           |
| Model D              | 0.032        | 0.022        | 0.172          | 0.049                         | 0.888        | 0.725        | 0.438        | 0.276        | 0.550                           |
| Model E              | <b>0.095</b> | <b>0.194</b> | 0.254          | <b>0.168</b>                  | 0.612        | 0.514        | 0.442        | 0.403        | 0.494                           |
| Model F              | 0.052        | 0.045        | 0.305          | 0.089                         | 0.819        | 0.740        | 0.704        | 0.604        | 0.719                           |
| Model G              | 0.088        | 0.014        | <b>0.422</b>   | 0.081                         | 0.796        | 0.633        | 0.565        | 0.517        | 0.628                           |
| Model H              | 0.000        | 0.000        | 0.061          | 0.002                         | 0.036        | 0.100        | 0.014        | 0.004        | 0.023                           |
| Model I <sup>c</sup> | 0.001        | 0.002        | 0.026          | 0.004                         | 0.107        | 0.165        | 0.217        | 0.177        | 0.159                           |
| Model J              | 0.001        | 0.048        | 0.198          | 0.023                         | 0.627        | 0.581        | 0.573        | 0.555        | 0.586                           |
| Model K <sup>c</sup> | 0.043        | 0.031        | 0.063          | 0.044                         | 0.304        | 0.269        | 0.234        | 0.186        | 0.248                           |
| Model L <sup>c</sup> | 0.012        | 0.004        | 0.143          | 0.019                         | <b>0.966</b> | <b>0.889</b> | <b>0.894</b> | 0.552        | <b>0.821</b>                    |
| Model M              | 0.001        | 0.001        | 0.002          | 0.001                         | 0.343        | 0.233        | 0.076        | 0.028        | 0.125                           |
| Median Team Skill    | 0.032        | 0.022        | 0.153          | 0.044                         | 0.627        | 0.514        | 0.438        | 0.276        | 0.494                           |
| Hist. Avg. Forecast  | 0.055        | 0.096        | 0.168          | 0.096                         | 0.376        | 0.390        | 0.417        | 0.436        | 0.402                           |
| FluSight Ensemble    | 0.086        | 0.128        | 0.332          | 0.154                         | 0.664        | 0.584        | 0.511        | 0.451        | 0.554                           |

<sup>a</sup> Average of submissions for onset week, peak week, and peak intensity

<sup>b</sup> Average of submissions for 1, 2, 3, and 4 weeks ahead

<sup>c</sup> First forecast received on MMWR week 45 (Model K), 49 (Model L), 50 (Model I), and week 4 (Model N)

Supplementary Table S8: Average forecast skill for HHS Region 8 targets by forecast team during the 2015-2016 influenza season. **Bold** denotes the highest scoring team for that target.

|                      | Onset week   | Peak week    | Peak intensity | Seasonal average <sup>a</sup> | 1 week ahead | 2 week ahead | 3 week ahead | 4 week ahead | Short-term average <sup>b</sup> |
|----------------------|--------------|--------------|----------------|-------------------------------|--------------|--------------|--------------|--------------|---------------------------------|
| Model A              | 0.003        | 0.009        | 0.298          | 0.023                         | 0.307        | 0.323        | 0.332        | 0.373        | 0.331                           |
| Model B              | 0.254        | <b>0.517</b> | 0.490          | 0.408                         | 0.735        | 0.707        | 0.727        | 0.729        | 0.725                           |
| Model C              | 0.136        | 0.088        | 0.511          | 0.185                         | 0.835        | 0.624        | 0.437        | 0.335        | 0.539                           |
| Model D              | 0.111        | 0.087        | 0.498          | 0.172                         | 0.913        | 0.806        | 0.680        | 0.436        | 0.697                           |
| Model E              | 0.276        | 0.426        | 0.609          | <b>0.423</b>                  | 0.722        | 0.677        | 0.645        | 0.631        | 0.670                           |
| Model F              | 0.122        | 0.292        | 0.664          | 0.297                         | 0.945        | 0.891        | 0.840        | <b>0.808</b> | 0.873                           |
| Model G              | <b>0.313</b> | 0.002        | 0.656          | 0.071                         | 0.894        | 0.799        | 0.724        | 0.682        | 0.776                           |
| Model H              | 0.003        | 0.015        | 0.664          | 0.034                         | 0.266        | 0.200        | 0.053        | 0.037        | 0.107                           |
| Model I <sup>c</sup> | 0.000        | 0.021        | 0.030          | 0.006                         | 0.138        | 0.197        | 0.286        | 0.435        | 0.234                           |
| Model J              | 0.047        | 0.000        | <b>0.701</b>   | 0.022                         | 0.787        | 0.680        | 0.582        | 0.546        | 0.649                           |
| Model K <sup>c</sup> | 0.054        | 0.018        | 0.081          | 0.043                         | 0.397        | 0.370        | 0.336        | 0.297        | 0.351                           |
| Model L <sup>c</sup> | 0.031        | 0.024        | 0.389          | 0.069                         | <b>0.991</b> | <b>0.941</b> | <b>0.884</b> | 0.799        | <b>0.906</b>                    |
| Model M              | 0.001        | 0.003        | 0.004          | 0.002                         | 0.160        | 0.111        | 0.098        | 0.073        | 0.108                           |
| Median Team Skill    | 0.054        | 0.021        | 0.498          | 0.069                         | 0.735        | 0.677        | 0.582        | 0.436        | 0.649                           |
| Hist. Avg. Forecast  | 0.225        | 0.263        | 0.277          | 0.256                         | 0.526        | 0.529        | 0.536        | 0.539        | 0.532                           |
| FluSight Ensemble    | 0.185        | 0.333        | 0.564          | 0.334                         | 0.763        | 0.703        | 0.651        | 0.602        | 0.682                           |

<sup>a</sup> Average of submissions for onset week, peak week, and peak intensity

<sup>b</sup> Average of submissions for 1, 2, 3, and 4 weeks ahead

<sup>c</sup> First forecast received on MMWR week 45 (Model K), 49 (Model L), 50 (Model I), and week 4 (Model N)

Supplementary Table S9: Average forecast skill for HHS Region 9 targets by forecast team during the 2015-2016 influenza season. **Bold** denotes the highest scoring team for that target.

|                      | Onset week   | Peak week    | Peak intensity | Seasonal average <sup>a</sup> | 1 week ahead | 2 week ahead | 3 week ahead | 4 week ahead | Short-term average <sup>b</sup> |
|----------------------|--------------|--------------|----------------|-------------------------------|--------------|--------------|--------------|--------------|---------------------------------|
| Model A              | 0.003        | 0.003        | <b>0.916</b>   | 0.024                         | 0.233        | 0.204        | 0.264        | 0.269        | 0.240                           |
| Model B              | 0.061        | 0.392        | 0.730          | 0.282                         | 0.582        | 0.431        | 0.436        | 0.519        | 0.489                           |
| Model C              | <b>0.199</b> | 0.253        | 0.204          | 0.218                         | 0.271        | 0.239        | 0.190        | 0.153        | 0.211                           |
| Model D              | 0.154        | 0.113        | 0.233          | 0.159                         | 0.365        | 0.291        | 0.253        | 0.160        | 0.261                           |
| Model E              | 0.182        | <b>0.416</b> | 0.603          | <b>0.372</b>                  | 0.605        | 0.548        | 0.531        | 0.527        | 0.554                           |
| Model F              | 0.085        | 0.105        | 0.632          | 0.186                         | 0.464        | 0.414        | 0.478        | 0.480        | 0.457                           |
| Model G              | 0.099        | 0.240        | 0.559          | 0.249                         | <b>0.641</b> | <b>0.559</b> | <b>0.552</b> | <b>0.531</b> | <b>0.572</b>                    |
| Model H              | 0.002        | 0.001        | 0.046          | 0.005                         | 0.007        | 0.027        | 0.013        | 0.004        | 0.010                           |
| Model I <sup>c</sup> | 0.002        | 0.014        | 0.013          | 0.008                         | 0.107        | 0.161        | 0.172        | 0.155        | 0.145                           |
| Model J              | 0.043        | 0.001        | 0.514          | 0.027                         | 0.210        | 0.091        | 0.064        | 0.072        | 0.099                           |
| Model K <sup>c</sup> | 0.038        | 0.063        | 0.050          | 0.050                         | 0.248        | 0.231        | 0.212        | 0.192        | 0.221                           |
| Model L <sup>c</sup> | 0.027        | 0.011        | 0.534          | 0.056                         | 0.187        | 0.148        | 0.224        | 0.234        | 0.194                           |
| Model M              | 0.000        | 0.002        | 0.002          | 0.001                         | 0.028        | 0.014        | 0.007        | 0.004        | 0.011                           |
| Median Team Skill    | 0.043        | 0.063        | 0.514          | 0.056                         | 0.248        | 0.231        | 0.224        | 0.192        | 0.221                           |
| Hist. Avg. Forecast  | 0.301        | 0.171        | 0.272          | 0.238                         | 0.378        | 0.392        | 0.405        | 0.414        | 0.396                           |
| FluSight Ensemble    | 0.166        | 0.256        | 0.522          | 0.290                         | 0.505        | 0.470        | 0.440        | 0.422        | 0.460                           |

<sup>a</sup> Average of submissions for onset week, peak week, and peak intensity

<sup>b</sup> Average of submissions for 1, 2, 3, and 4 weeks ahead

<sup>c</sup> First forecast received on MMWR week 45 (Model K), 49 (Model L), 50 (Model I), and week 4 (Model N)

Supplementary Table S10: Average forecast skill for HHS Region 10 targets by forecast team during the 2015-2016 influenza season. **Bold** denotes the highest scoring team for that target.

|                      | Onset week   | Peak week    | Peak intensity | Seasonal average <sup>a</sup> | 1 week ahead | 2 week ahead | 3 week ahead | 4 week ahead | Short-term average <sup>b</sup> |
|----------------------|--------------|--------------|----------------|-------------------------------|--------------|--------------|--------------|--------------|---------------------------------|
| Model A              | 0.004        | 0.020        | 0.680          | 0.046                         | 0.331        | 0.301        | 0.392        | 0.396        | 0.351                           |
| Model B              | 0.122        | <b>0.478</b> | 0.490          | <b>0.331</b>                  | 0.636        | 0.565        | 0.587        | 0.538        | 0.582                           |
| Model C              | <b>0.202</b> | 0.366        | 0.291          | 0.286                         | 0.852        | 0.762        | 0.713        | 0.609        | 0.734                           |
| Model D              | 0.196        | 0.295        | 0.283          | 0.260                         | 0.829        | 0.744        | 0.688        | 0.492        | 0.684                           |
| Model E              | 0.092        | 0.392        | 0.482          | 0.283                         | 0.625        | 0.587        | 0.580        | 0.552        | 0.587                           |
| Model F              | 0.106        | 0.392        | 0.520          | 0.303                         | 0.833        | 0.756        | <b>0.750</b> | 0.749        | 0.773                           |
| Model G              | 0.167        | 0.195        | 0.395          | 0.241                         | 0.656        | 0.565        | 0.537        | 0.521        | 0.570                           |
| Model H              | 0.005        | 0.152        | <b>0.722</b>   | 0.105                         | 0.070        | 0.114        | 0.085        | 0.033        | 0.070                           |
| Model I <sup>c</sup> | 0.000        | 0.014        | 0.030          | 0.007                         | 0.154        | 0.212        | 0.308        | 0.465        | 0.255                           |
| Model J              | 0.101        | 0.000        | 0.523          | 0.024                         | 0.340        | 0.245        | 0.197        | 0.262        | 0.258                           |
| Model K <sup>c</sup> | 0.041        | 0.066        | 0.085          | 0.063                         | 0.308        | 0.295        | 0.288        | 0.275        | 0.292                           |
| Model L <sup>c</sup> | 0.035        | 0.038        | 0.581          | 0.100                         | <b>0.952</b> | <b>0.819</b> | 0.738        | <b>0.791</b> | <b>0.825</b>                    |
| Model M              | 0.001        | 0.003        | 0.004          | 0.002                         | 0.047        | 0.040        | 0.031        | 0.025        | 0.035                           |
| Median Team Skill    | 0.092        | 0.152        | 0.482          | 0.105                         | 0.625        | 0.565        | 0.537        | 0.492        | 0.570                           |
| Hist. Avg. Forecast  | 0.160        | 0.195        | 0.101          | 0.145                         | 0.375        | 0.380        | 0.397        | 0.410        | 0.389                           |
| FluSight Ensemble    | 0.184        | 0.326        | 0.526          | 0.331                         | 0.679        | 0.625        | 0.603        | 0.568        | 0.620                           |

<sup>a</sup> Average of submissions for onset week, peak week, and peak intensity

<sup>b</sup> Average of submissions for 1, 2, 3, and 4 weeks ahead

<sup>c</sup> First forecast received on MMWR week 45 (Model K), 49 (Model L), 50 (Model I), and week 4 (Model N)

Supplementary Table S11: Median average team score for mechanistic models and statistical models across all regions for targets during MMWR weeks 50, 51, 52, and 1, when there is a historical upwards and downwards trend in wILI% in many regions.

| Target         | Mechanistic Model | Statistical Model |
|----------------|-------------------|-------------------|
| 1 week ahead   | -2.569            | -0.899            |
| 2 week ahead   | -2.793            | -0.870            |
| 3 week ahead   | -2.821            | -0.846            |
| 4 week ahead   | -2.860            | -0.932            |
| Onset week     | -4.101            | -3.745            |
| Peak week      | -4.906            | -3.821            |
| Peak intensity | -2.608            | -1.144            |

Supplementary Figure S1: Difference between initial published value of wILI% and final published value of wILI% by MMWR week throughout the 2015-2016 influenza season. Positive values indicate the final value was higher than the initial value.

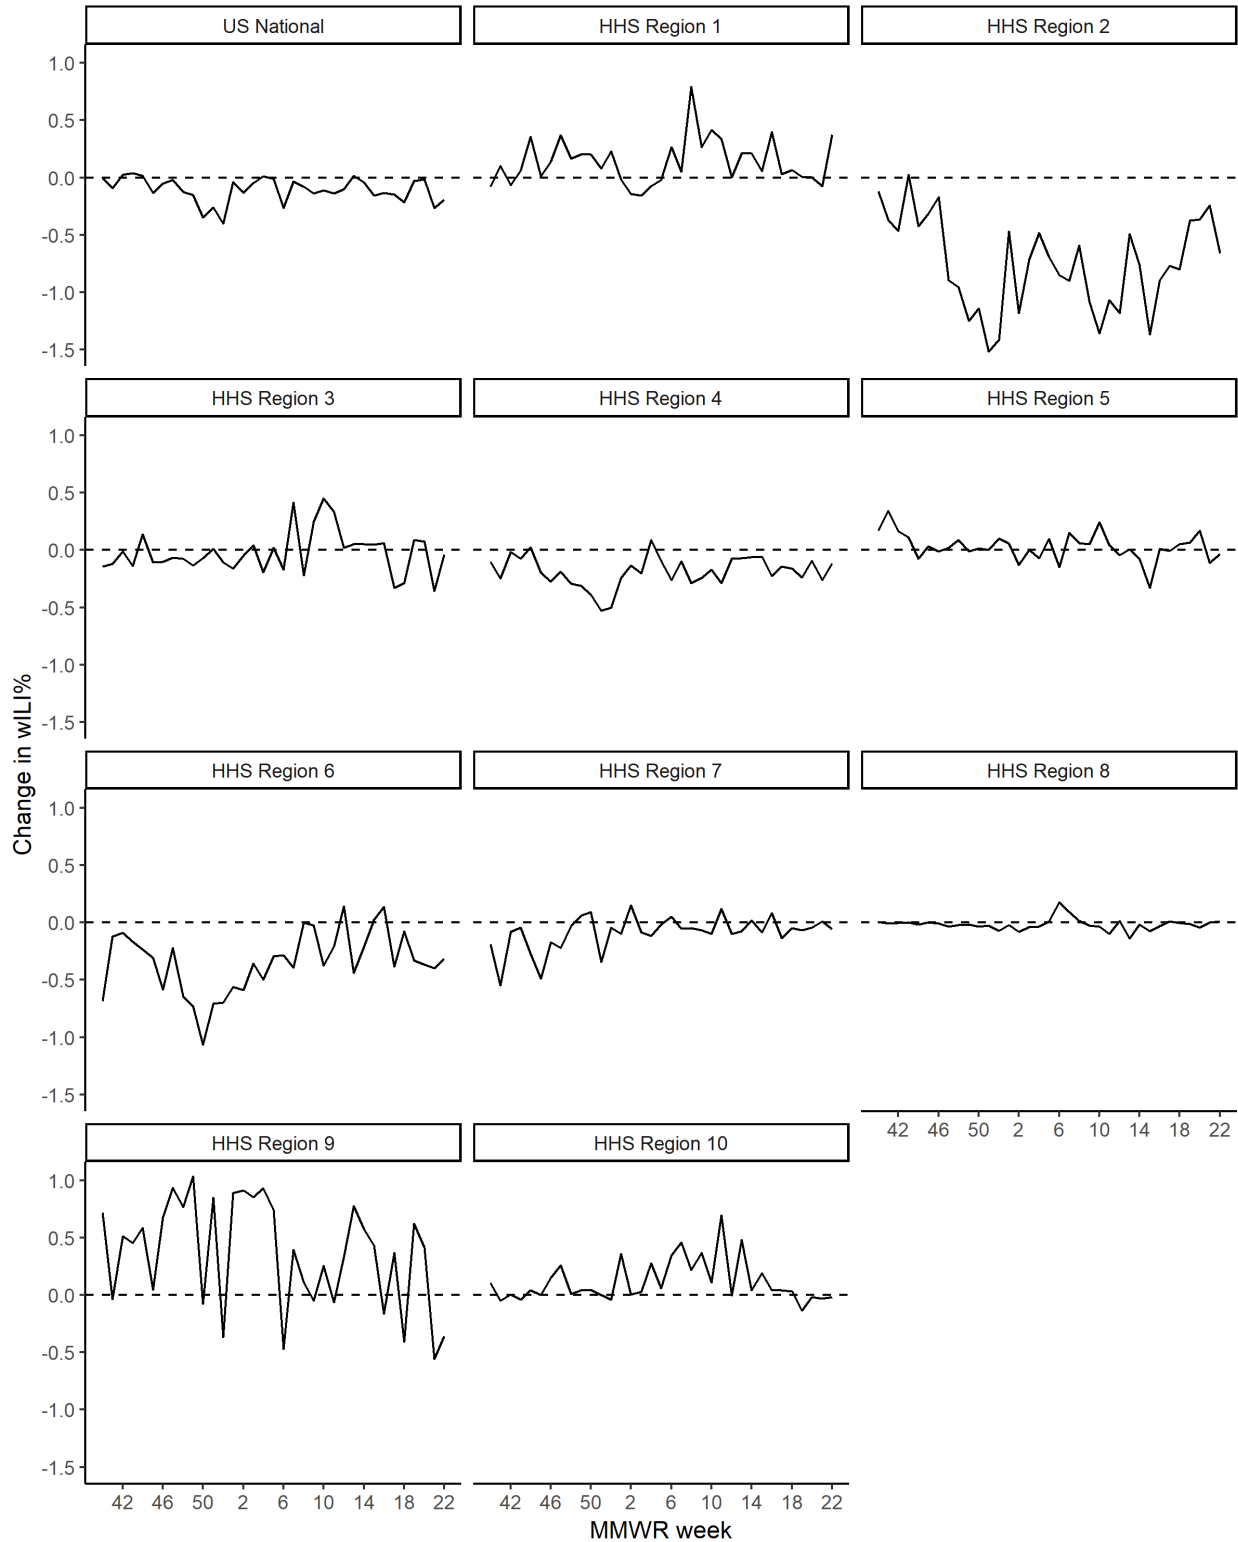

Supplement: 41598_2018_36361_MOESM1_ESM.pdf [file 41598_2018_36361_MOESM1_ESM.pdf]
